# Supplementary material
Source: publisher figshare collection journal article supplement (https://karger.figshare.com/articles/dataset/_/7583366)

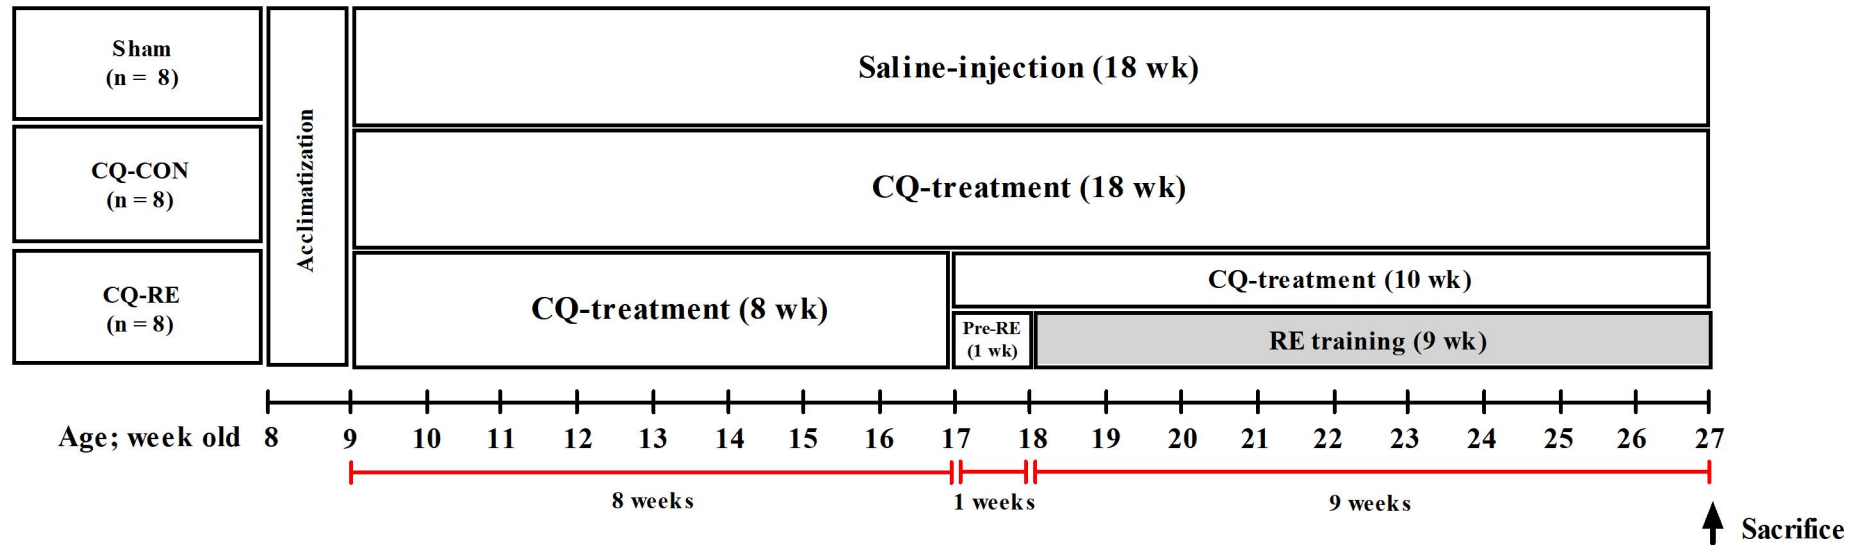

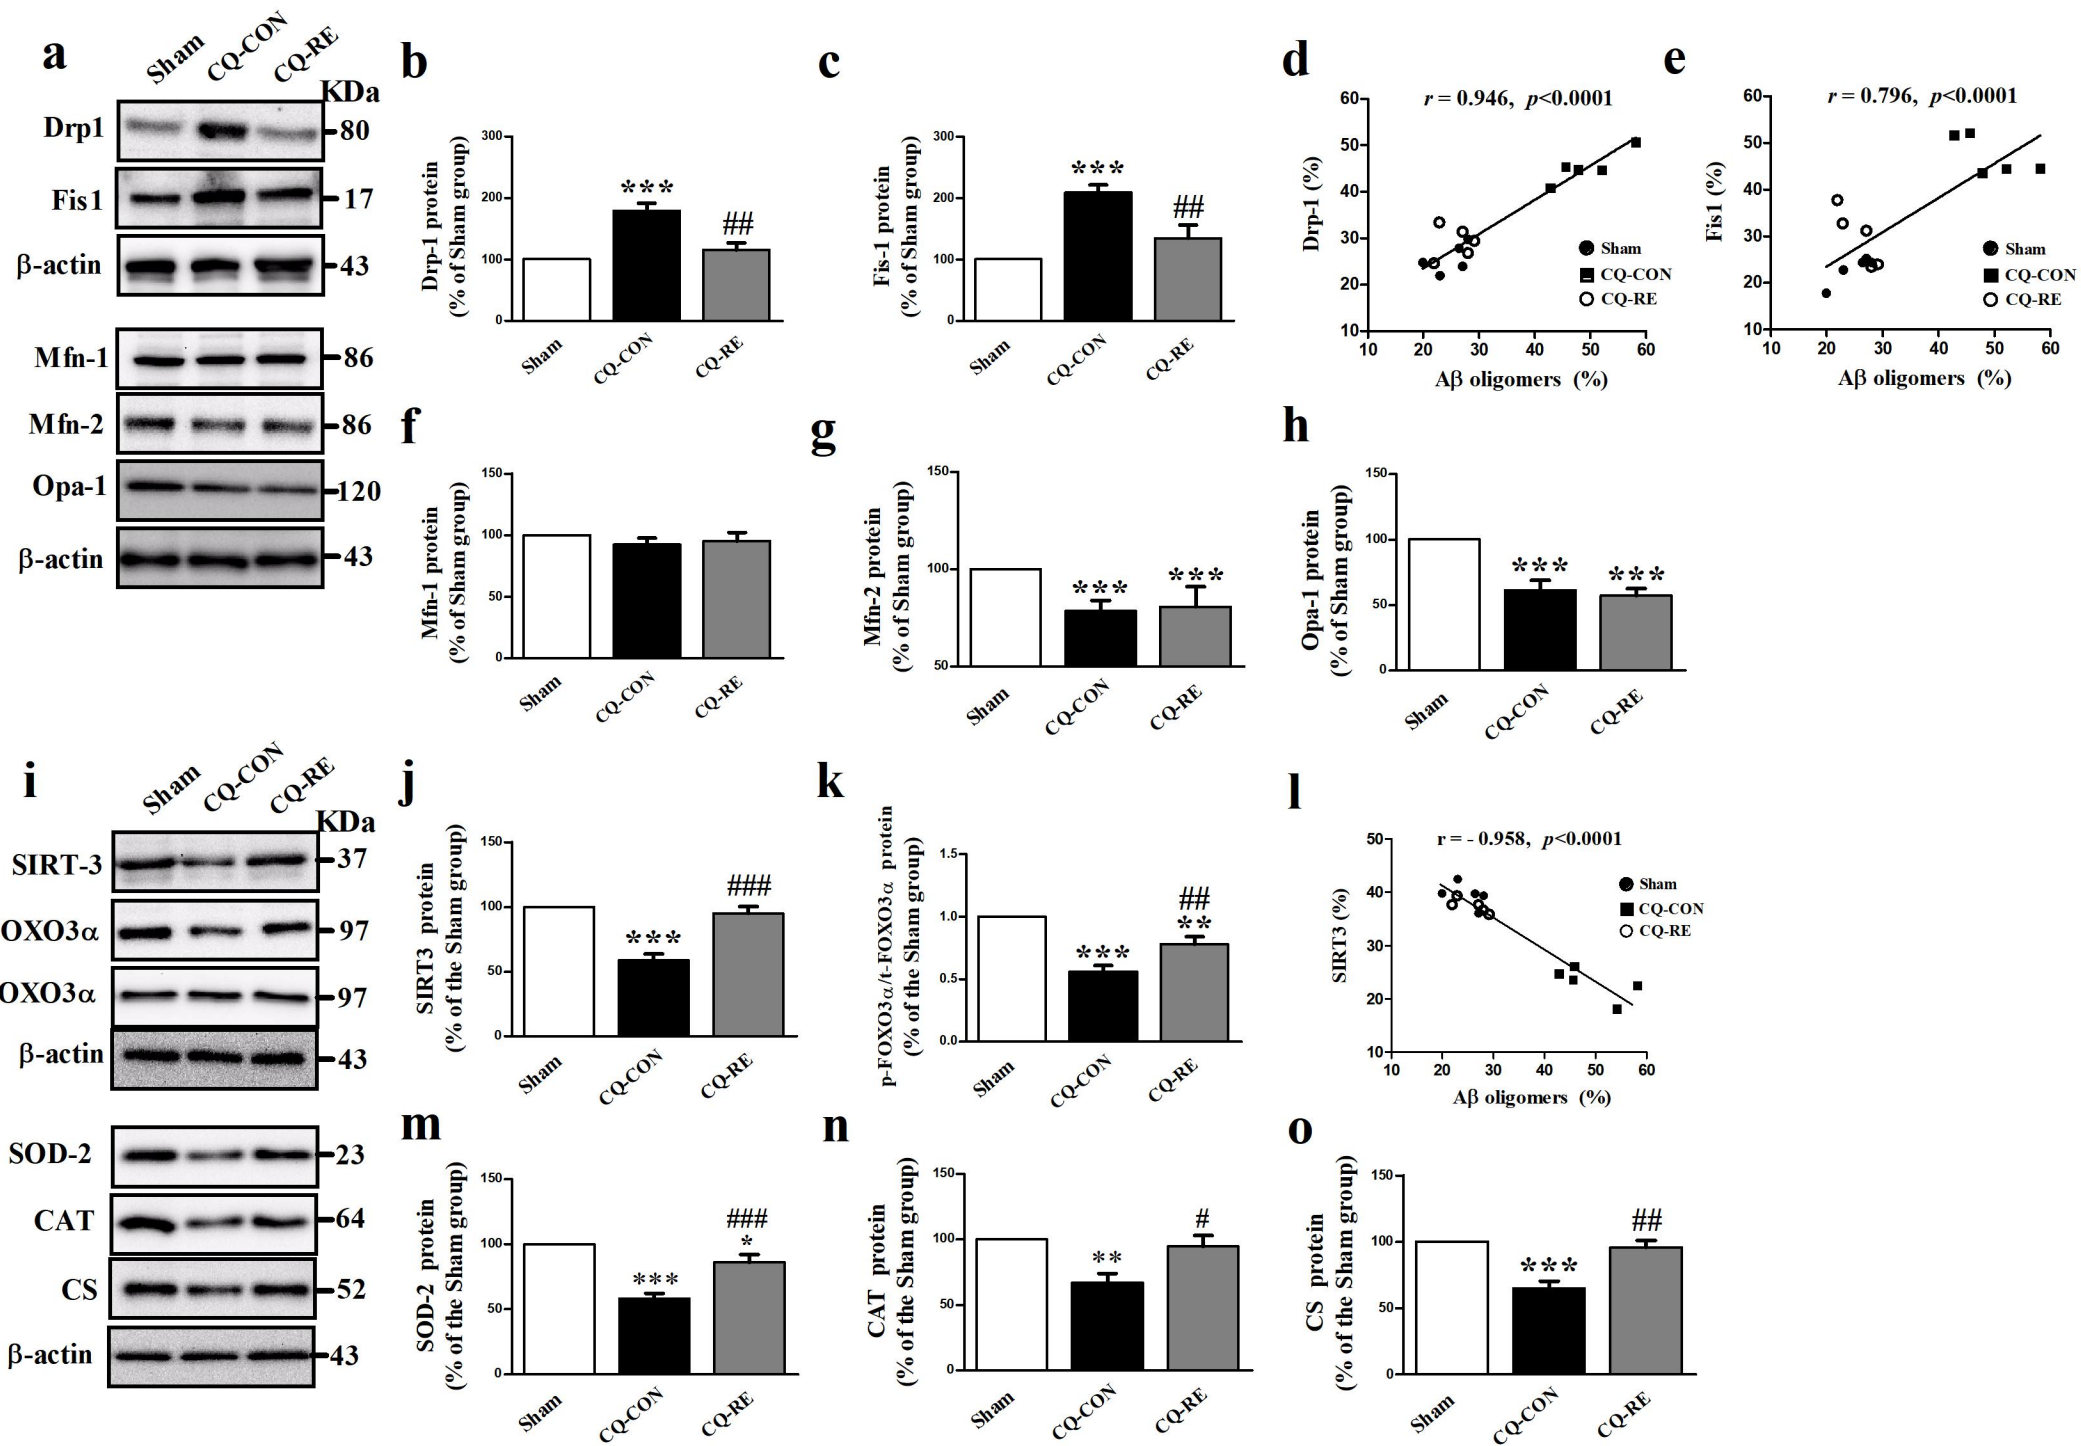

**RE training**

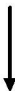

**A $\beta$  accumulation** ↓

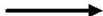

**SIRT3/FOXO3 $\alpha$**  ↑  
**signaling**

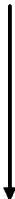

**mitochondria** ↑  
**antioxidant capacity**

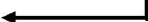

**CQ-induced muscle impairment** ↓

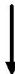

**mitochondrial quality controls** ↑

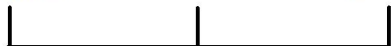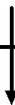

**mitochondrial** ↑  
**dynamic**

**mitophagy** ↑

**mitochondrial** ↑  
**biogenesis**

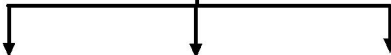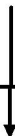

Supplement: Supplementary file 1 [file 1]
